# Supplementary material
Source: Springer Nature journal article supplement (https://www.springermedizin.de/resource/supplementary/12889_2010_3172_MOESM2_ESM.pdf/9488278)
Supplement: MOESM2 [file 9488278]

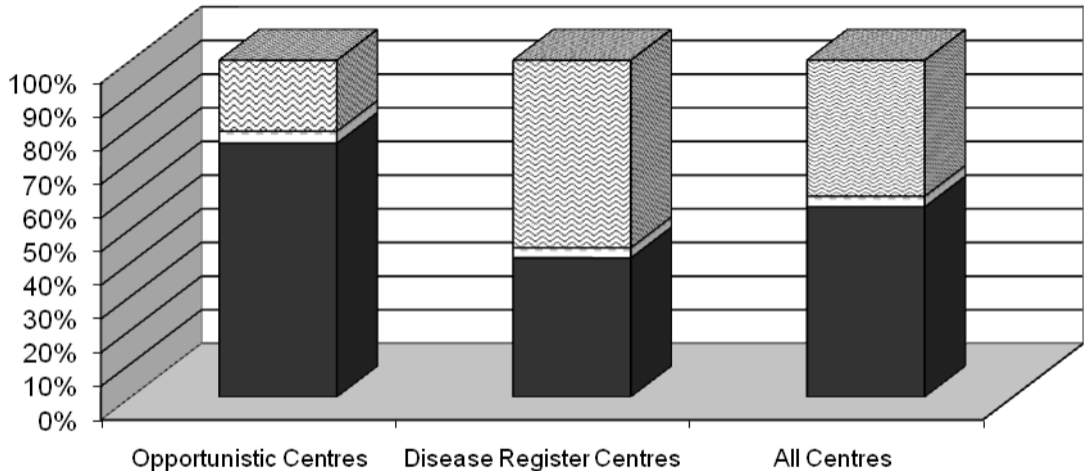

■ Delivering patient consultations    □ Let's Get Moving' resource booklet    ▨ Delivering support activities
